# Supplementary material
Source: publisher figshare collection journal article supplement (https://acs.figshare.com/ndownloader/files/3605955)

Supplementary figure 1.

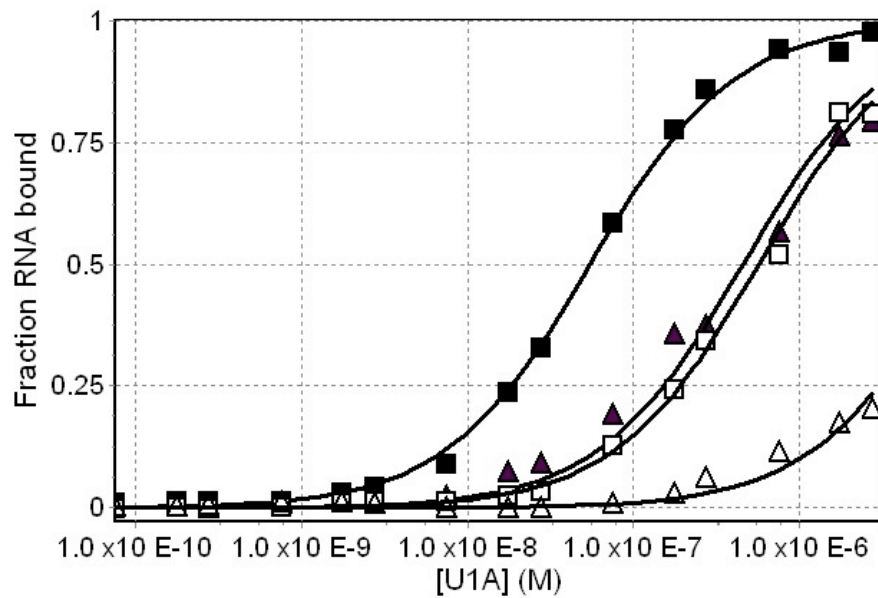

Binding curves and fits for FL U1A (□, ■) and U1A RRM1 (△, ▲) binding to SLIV

(closed symbols) or N25 (open symbols) RNA. N25 is an RNA with a 25 randommer sequence, used as a control for nonspecific binding. Experiments were done with nitrocellulose filter binding. The solution conditions were 100mM KCl 10mM cacodylate 1mM MgCl<sub>2</sub> pH 7 at 22°C.

Supplementary Figure 2.

SLII protein partitioning in humans.

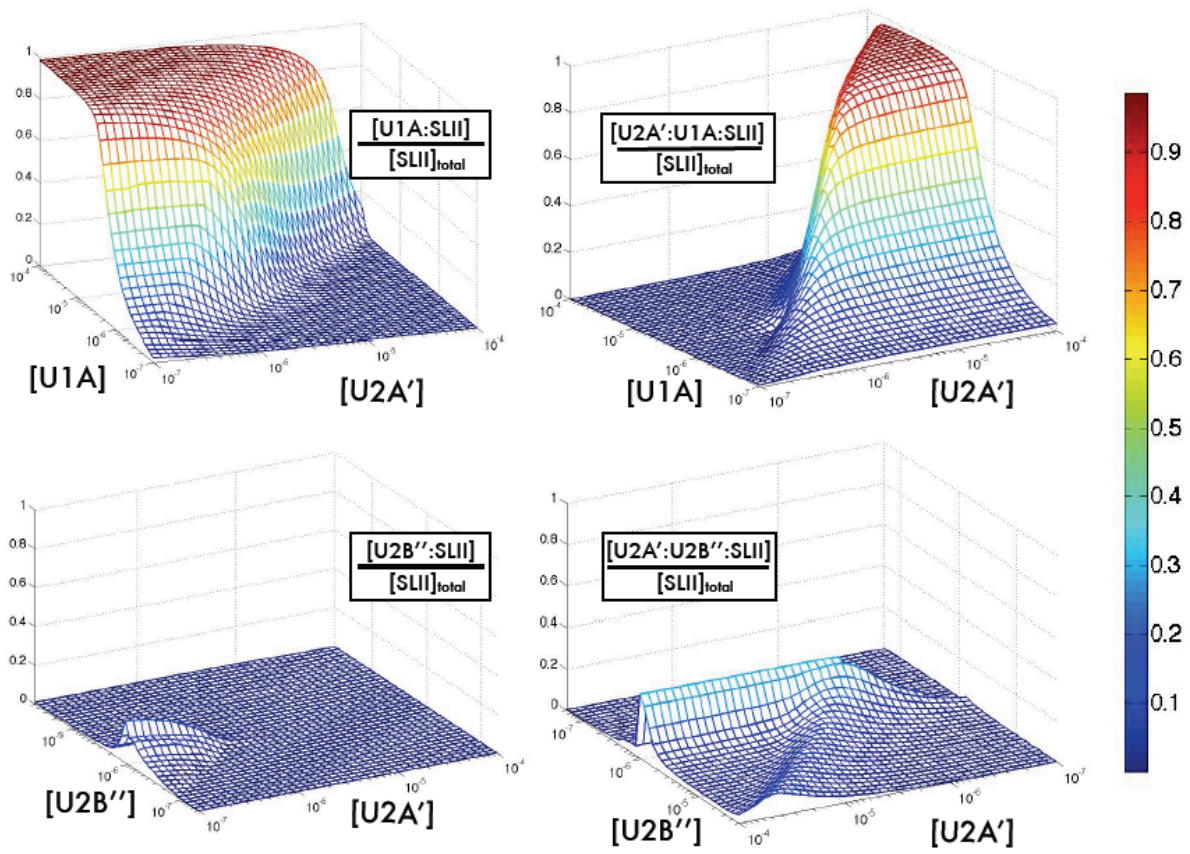

Supplementary figure 3.  
Protein partitioning on SLIV in humans.

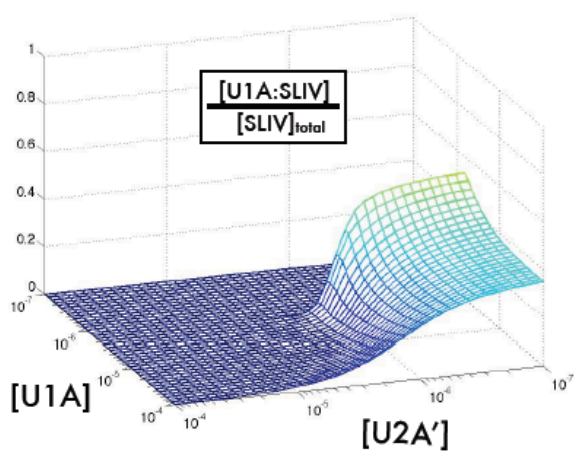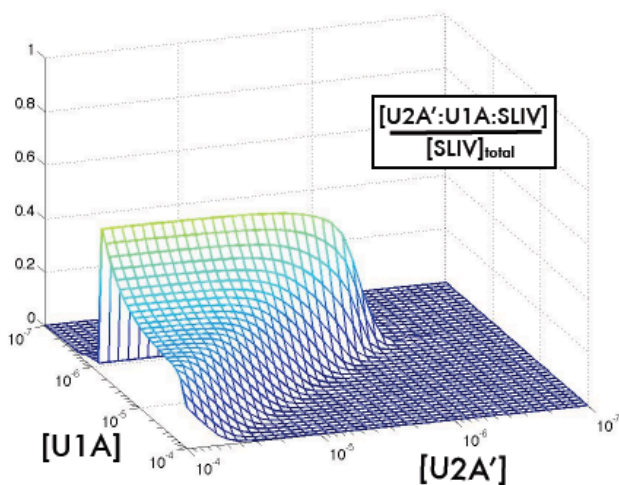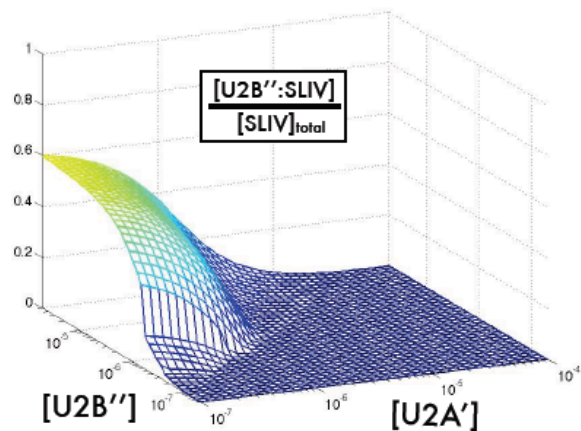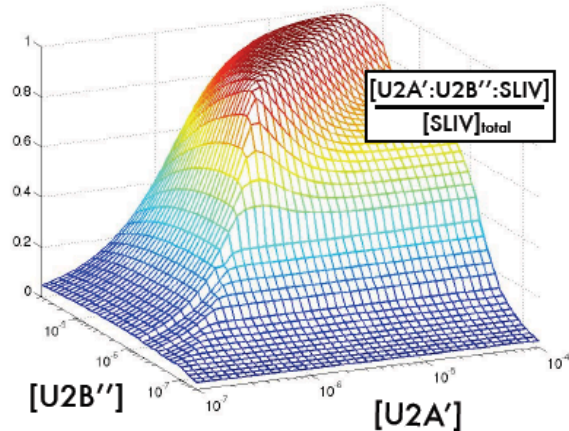

Supplementary Figure 4.

Ternary complex formation on SLII and SLIV, at variable ratios of U1A:U2B''.

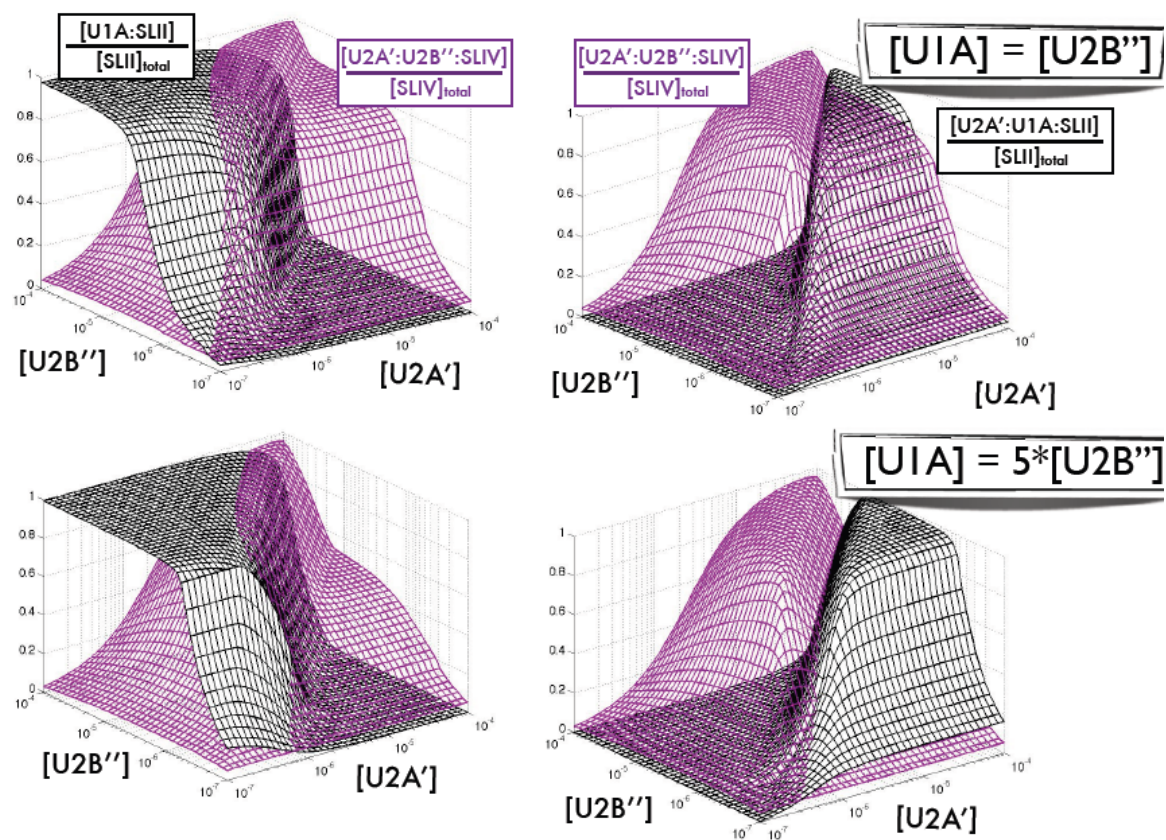



Supplementary figure 5.

(A.) SNF only.

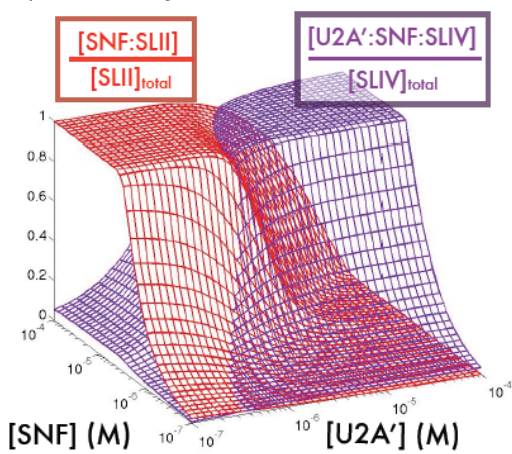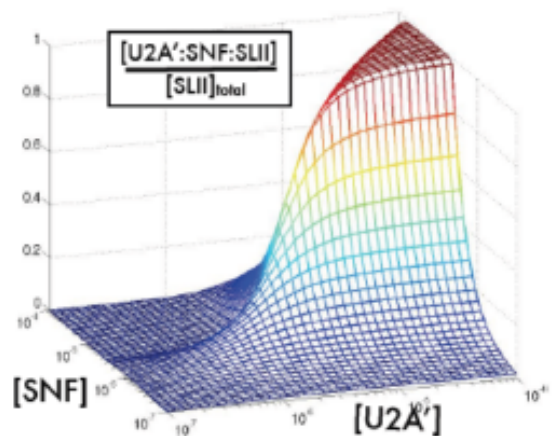

(B) U1A only.

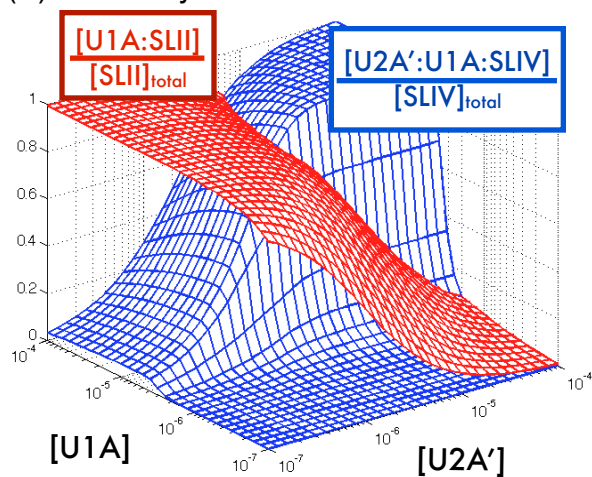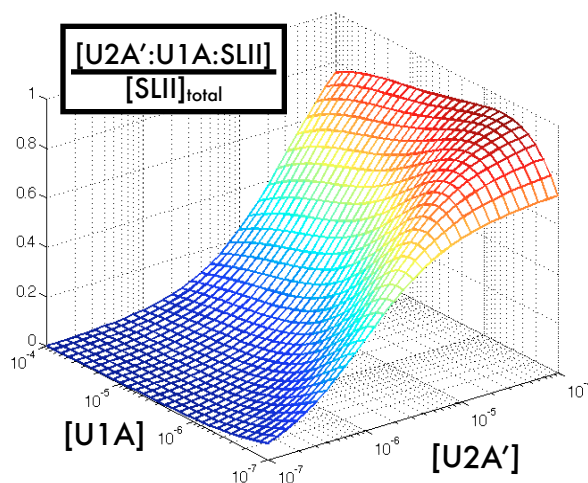

U2B'' only.

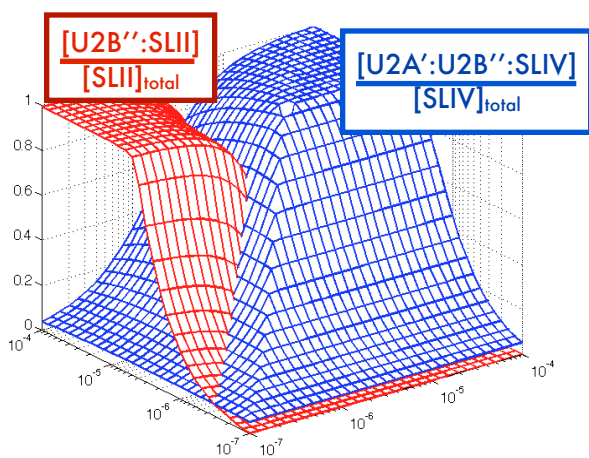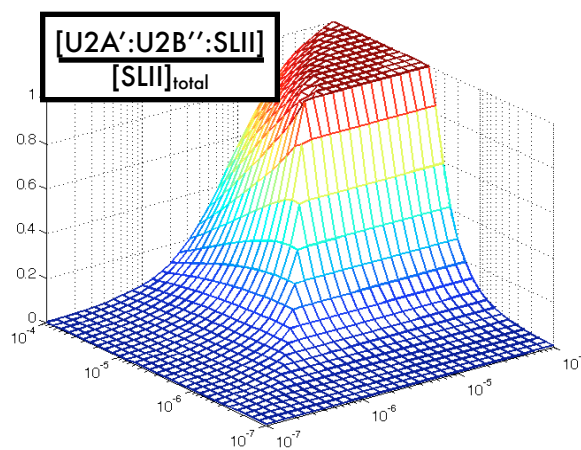

Supplement: Supplementary file 1 [file 3605955]
